# Supplementary material for: Enhanced photocatalytic hydrogen activities of CoV-LDH/ZnIn2S4 nanocomposites
Source: Royal Society of Chemistry journal article supplement (doi:10.1039/d4nj01964d), 2024-01-01
Supplement: d4nj01964d1.pdf [file d4nj01964d1.pdf]

## Supporting Information

### Enhanced photocatalytic hydrogen activities of CoV-LDH/ZnIn<sub>2</sub>S<sub>4</sub> nanocomposites

Qianchen Ou <sup>a,b,†</sup>, Yuejie Jia <sup>b,†</sup>, Xiaoxia Yang <sup>c</sup>, Ningwen Zhang <sup>b</sup>, Shuaikang Qi <sup>b</sup>, Hanfeng Lu <sup>a</sup>,  
Liping Guo <sup>b</sup>, Hongmei Wang <sup>b,\*</sup>, Jun Tan <sup>b,\*</sup>

<sup>a</sup> College of Chemical Engineering, Zhejiang University of Technology, Hangzhou 310014, China

<sup>b</sup> Jiaxing Key Laboratory of Molecular Recognition and Sensing, College of Biological, Chemical Sciences and Engineering, Jiaxing University, Jiaxing 314001, China

<sup>c</sup> Jiaxing Eco-Environmental Monitoring Center of Zhejiang, Jiaxing 314001, China

†These authors contributed equally to this work.

\*Corresponding authors (E-mail: hongmei256@163.com (Wang H); E-mail: tanjunzjxu@126.com (Tan J))

**Table S1** Hydrogen production of ZnIn<sub>2</sub>S<sub>4</sub>-based photocatalysts

| Catalysts                                                          | Light source         | Sacrificial reagent                                    | H <sub>2</sub> yield (μmol·g <sup>-1</sup> ) | Ref.      |
|--------------------------------------------------------------------|----------------------|--------------------------------------------------------|----------------------------------------------|-----------|
| 2.0%-CoV-LDH/<br>ZnIn <sub>2</sub> S <sub>4</sub>                  | λ>400 nm<br>300 W Xe | Na <sub>2</sub> SO <sub>3</sub> /<br>Na <sub>2</sub> S | 1397.3                                       | This work |
| CoS/ZnIn <sub>2</sub> S <sub>4</sub>                               | λ>350 nm<br>300 W Xe | TEOA                                                   | 879                                          | [S1]      |
| SiO <sub>2</sub> /ZnIn <sub>2</sub> S <sub>4</sub>                 | sunlight             | Na <sub>2</sub> SO <sub>3</sub> /<br>Na <sub>2</sub> S | 796                                          | [S2]      |
| CuInS <sub>2</sub> /ZnIn <sub>2</sub> S <sub>4</sub>               | λ>420 nm<br>300 W Xe | Na <sub>2</sub> SO <sub>3</sub> /<br>Na <sub>2</sub> S | 1168                                         | [S3]      |
| AgIn <sub>5</sub> S <sub>8</sub> /ZnIn <sub>2</sub> S <sub>4</sub> | λ>420 nm<br>300 W Xe | Na <sub>2</sub> SO <sub>3</sub> /<br>Na <sub>2</sub> S | 949.9                                        | [S4]      |
| Ti <sub>3</sub> C <sub>2</sub> /ZnIn <sub>2</sub> S <sub>4</sub>   | λ>420 nm<br>300 W Xe | TEOA                                                   | 978.7                                        | [S5]      |
| MoS <sub>2</sub> -RGO/<br>ZnIn <sub>2</sub> S <sub>4</sub>         | λ>420 nm<br>300 W Xe | lactic acid                                            | 425.1                                        | [S6]      |

**Table S2** Apparent quantum efficiency of 2.0%-CoV-LDH/ZnIn<sub>2</sub>S<sub>4</sub>

| Samples                                       | 420 nm | 450 nm | 475 nm |
|-----------------------------------------------|--------|--------|--------|
| 2.0%-CoV-LDH/ZnIn <sub>2</sub> S <sub>4</sub> | 11.53% | 8.26%  | 2.14%  |

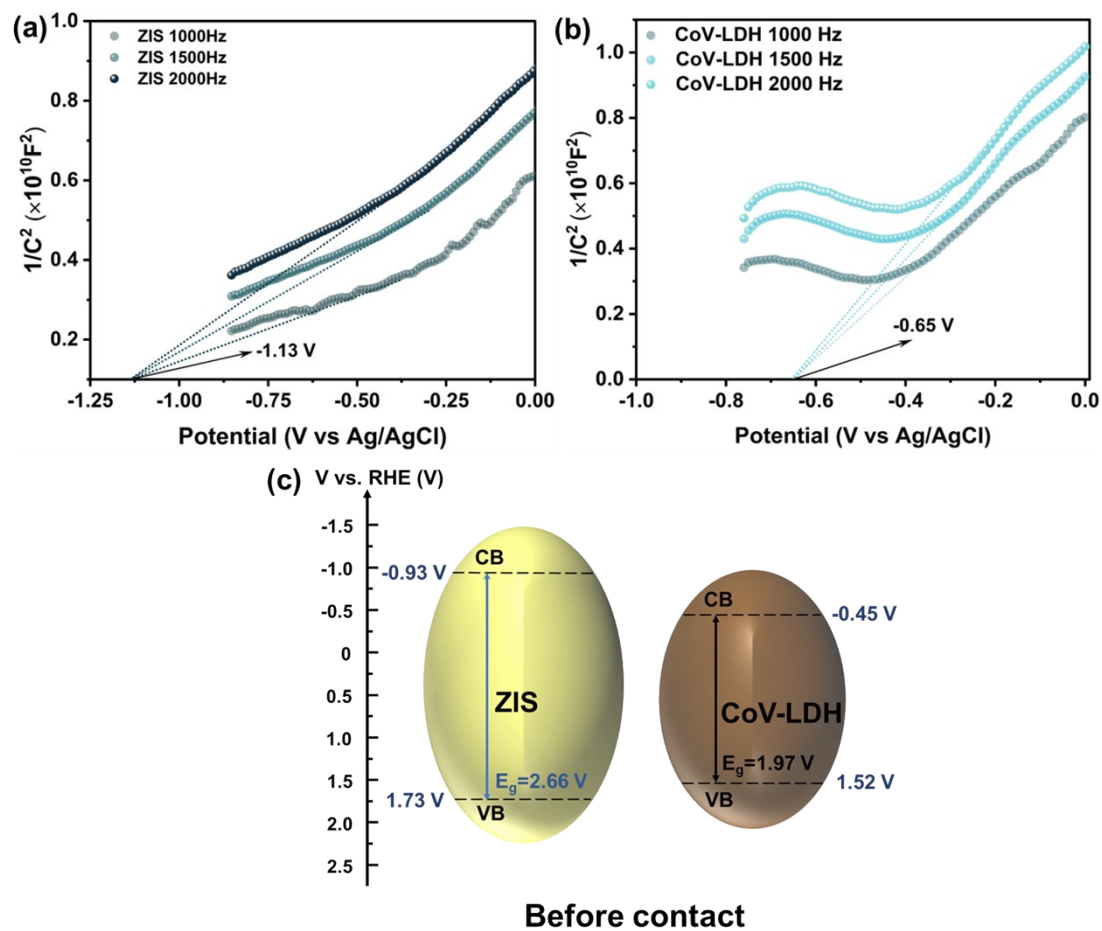

Figure S1 (a-b) Mott-Schottky plots of the CoV-LDH and ZIS CoV-LDH and ZIS samples. (c)

Band structure of CoV-LDH and ZIS.

## References

- [S1] X Xi, Q Dang, G Wang, et al. ZIF-67-derived flower-like ZnIn<sub>2</sub>S<sub>4</sub>@CoS<sub>2</sub> heterostructures for photocatalytic hydrogen production[J]. *New J. Chem.*, 2021, 45(43): 20289–20295.
- [S2] A R Gunjal, Y A Sethi, U V Kawade, et al. Unique hierarchical SiO<sub>2</sub>@ZnIn<sub>2</sub>S<sub>4</sub> marigold flower like nanoheterostructure for solar hydrogen production[J]. *RSC Adv.*, 2021, 11(24): 14399–14407.

- [S3] X Guo, Y Peng, G Liu, et al. An efficient ZnIn<sub>2</sub>S<sub>4</sub>@CuInS<sub>2</sub> core-shell p-n heterojunction to boost visible-light photocatalytic hydrogen evolution[J]. *J. Phys. Chem. C*, 2020, 124(11): 5934–5943.
- [S4] Z Guan, Z Xu, Q Li, et al. AgIn<sub>5</sub>S<sub>8</sub> nanoparticles anchored on 2d layered ZnIn<sub>2</sub>S<sub>4</sub> to form 0d/2d heterojunction for enhanced visible-light photocatalytic hydrogen evolution[J]. *Appl. Catal. B Environ.*, 2018, 227: 512–518.
- [S5] W Huang, Z Li, C Wu, et al. Delaminating Ti<sub>3</sub>C<sub>2</sub> mxene by blossom of ZnIn<sub>2</sub>S<sub>4</sub> microflowers for noble-metal-free photocatalytic hydrogen production[J]. *J. Mater. Sci. Technol.*, 2022, 120: 89–98.
- [S6] Z Guan, P Wang, Q Li, et al. Constructing a ZnIn<sub>2</sub>S<sub>4</sub> nanoparticle/MoS<sub>2</sub>-RGO nanosheet 0d/2d heterojunction for significantly enhanced visible-light photocatalytic H<sub>2</sub> production[J]. *Dalton Trans.*, 2018, 47(19): 6800–6807.
